# Supplementary material
Source: Springer Nature journal article supplement (https://www.springermedizin.de/resource/supplementary/12865_2010_342_MOESM5_ESM.pdf/9427792)

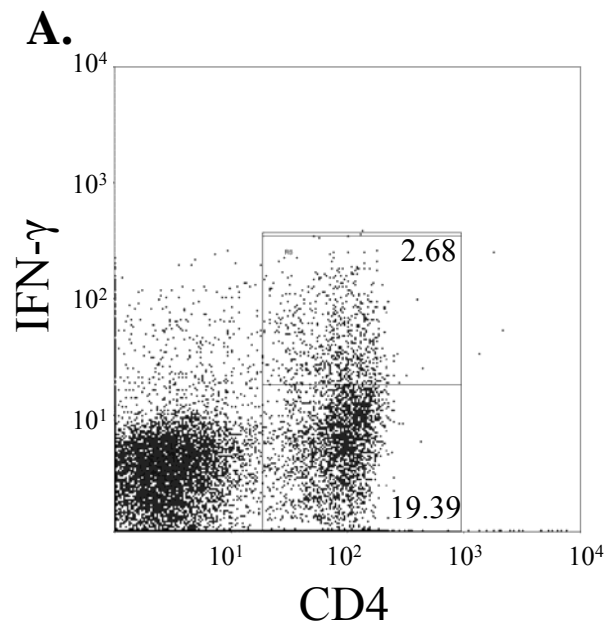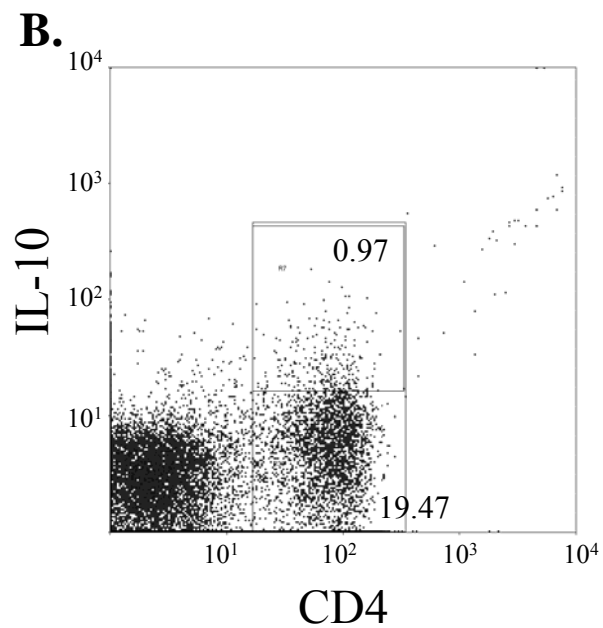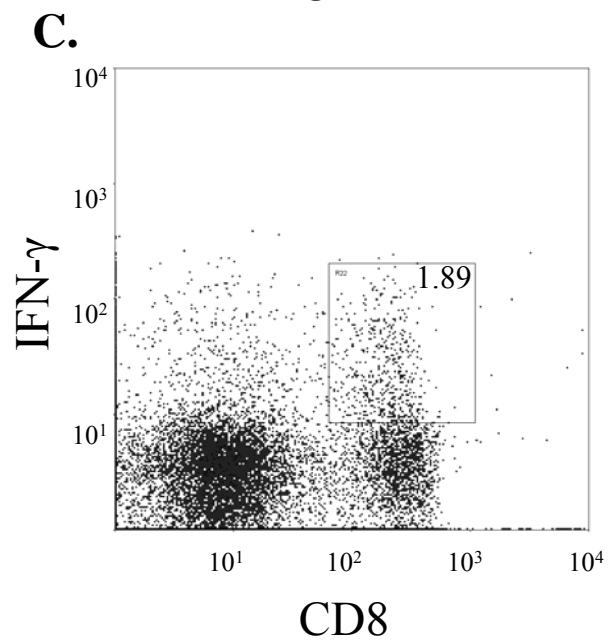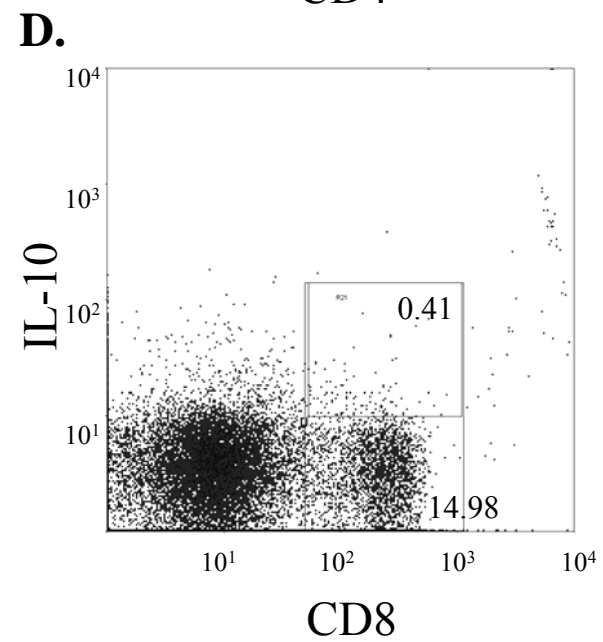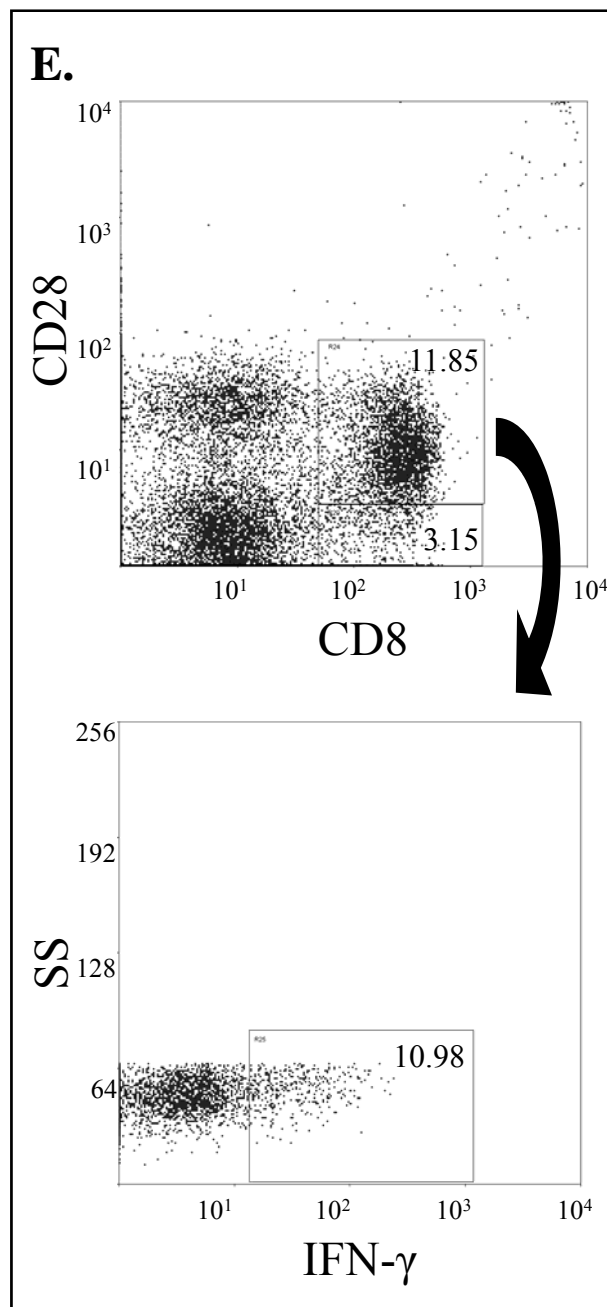

Supplement: MOESM5 [file 9427792]
